# Supplementary material for: UBR1 is a prognostic biomarker and therapeutic target associated with immune cell infiltration in gastric cancer
Source: publisher site journal article supplement (doi:10.18632/aging.206079), 2024-08-23
Supplement: Supplementary file [file aging-v16i16-206079-supplementary-material-SD1.pdf]

## SUPPLEMENTARY TABLE

**Supplementary Table 1. Baseline information table for UBR1 in the TCGA database.**

| Characteristics                       | Low expression of UBR1 | High expression of UBR1 | P-value |
|---------------------------------------|------------------------|-------------------------|---------|
| <i>n</i>                              | 187                    | 188                     |         |
| Pathologic T stage, <i>n</i> (%)      |                        |                         | <0.001  |
| T1 and T2                             | 57 (15.5%)             | 42 (11.4%)              |         |
| T3                                    | 96 (26.2%)             | 72 (19.6%)              |         |
| T4                                    | 34 (9.3%)              | 66 (18%)                |         |
| Pathologic N stage, <i>n</i> (%)      |                        |                         | 0.869   |
| N0                                    | 59 (16.5%)             | 52 (14.6%)              |         |
| N1                                    | 48 (13.4%)             | 49 (13.7%)              |         |
| N2                                    | 39 (10.9%)             | 36 (10.1%)              |         |
| N3                                    | 35 (9.8%)              | 39 (10.9%)              |         |
| Pathologic M stage, <i>n</i> (%)      |                        |                         | 0.893   |
| M0                                    | 167 (47%)              | 163 (45.9%)             |         |
| M1                                    | 13 (3.7%)              | 12 (3.4%)               |         |
| Pathologic stage, <i>n</i> (%)        |                        |                         | 0.291   |
| Stage I                               | 28 (8%)                | 25 (7.1%)               |         |
| Stage II                              | 64 (18.2%)             | 47 (13.4%)              |         |
| Stage III                             | 69 (19.6%)             | 81 (23%)                |         |
| Stage IV                              | 18 (5.1%)              | 20 (5.7%)               |         |
| Primary therapy outcome, <i>n</i> (%) |                        |                         | 0.726   |
| PD                                    | 34 (10.7%)             | 31 (9.8%)               |         |
| SD                                    | 9 (2.8%)               | 8 (2.5%)                |         |
| PR                                    | 1 (0.3%)               | 3 (0.9%)                |         |
| CR                                    | 124 (39.1%)            | 107 (33.8%)             |         |
| Gender, <i>n</i> (%)                  |                        |                         | 0.048   |
| Female                                | 76 (20.3%)             | 58 (15.5%)              |         |
| Male                                  | 111 (29.6%)            | 130 (34.7%)             |         |
| Age, <i>n</i> (%)                     |                        |                         | 0.041   |
| ≤65                                   | 92 (24.8%)             | 72 (19.4%)              |         |
| >65                                   | 94 (25.3%)             | 113 (30.5%)             |         |
| Histological type, <i>n</i> (%)       |                        |                         | 0.648   |
| Diffuse type                          | 33 (8.8%)              | 30 (8%)                 |         |
| Mucinous type                         | 11 (2.9%)              | 8 (2.1%)                |         |
| Not otherwise specified               | 101 (27%)              | 106 (28.3%)             |         |
| Papillary type                        | 3 (0.8%)               | 2 (0.5%)                |         |
| Tubular type                          | 36 (9.6%)              | 33 (8.8%)               |         |
| Signet ring type                      | 3 (0.8%)               | 8 (2.1%)                |         |
| Antireflux treatment, <i>n</i> (%)    |                        |                         | <0.001  |
| No                                    | 51 (28.5%)             | 91 (50.8%)              |         |
| Yes                                   | 25 (14%)               | 12 (6.7%)               |         |
